# Supplementary material
Source: PubMed Central journal article supplement (PMC3791258)
Supplement: mmc1.pdf [file mmc1.pdf]

## Supplemental Data

### Topical Enzyme-Replacement Therapy Restores Transglutaminase 1 Activity and Corrects Architecture of Transglutaminase-1-Deficient Skin Grafts

Karin Aufenvenne, Fernando Larcher, Ingrid Hausser, Blanca Duarte, Vinzenz Oji, Heike Nikolenko, Marcela Del Rio, Margitta Dathe, and Heiko Traupe

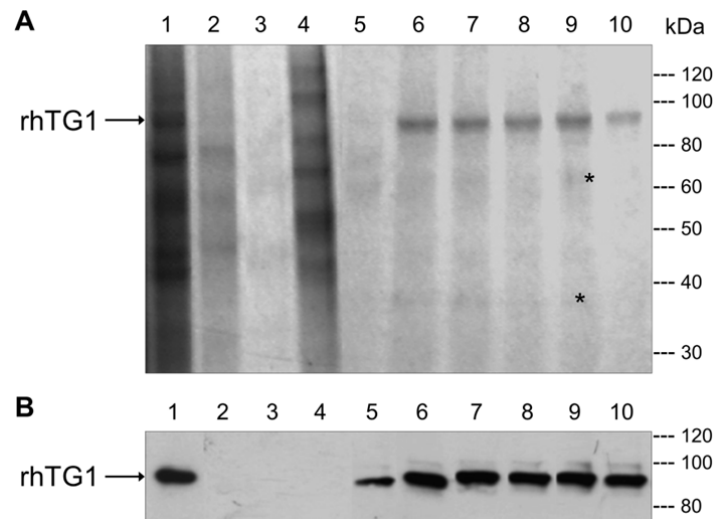

**Figure S1. Recombinant Expression and Purification of Human Full-Length Transglutaminase 1**

**A:** Coomassie stained SDS-Gel (10%) and **B:** Western Blot of different expression and purification steps. Lane 1, cell lysate before purification; lanes 2,3, washing steps with 20 mM imidazole; lane 4, washing step with 40 mM imidazole; lanes 5-10 elution steps. Lanes 6-10 in **A** show highly purified rhTG1.

**A**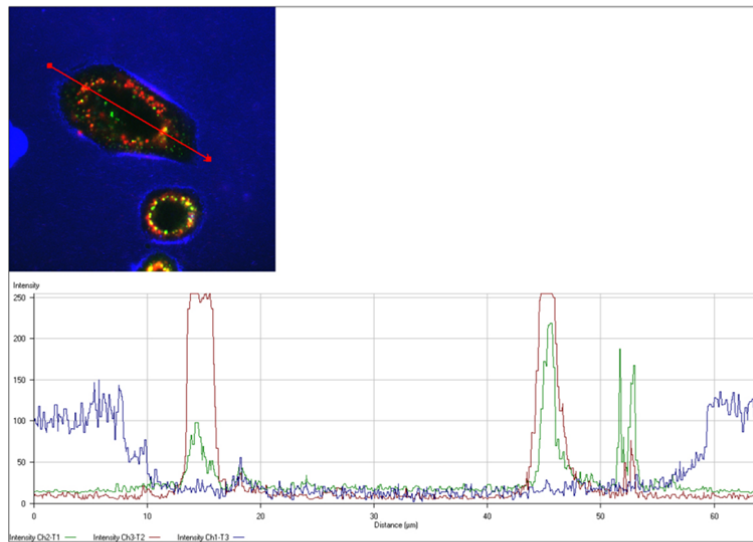**B**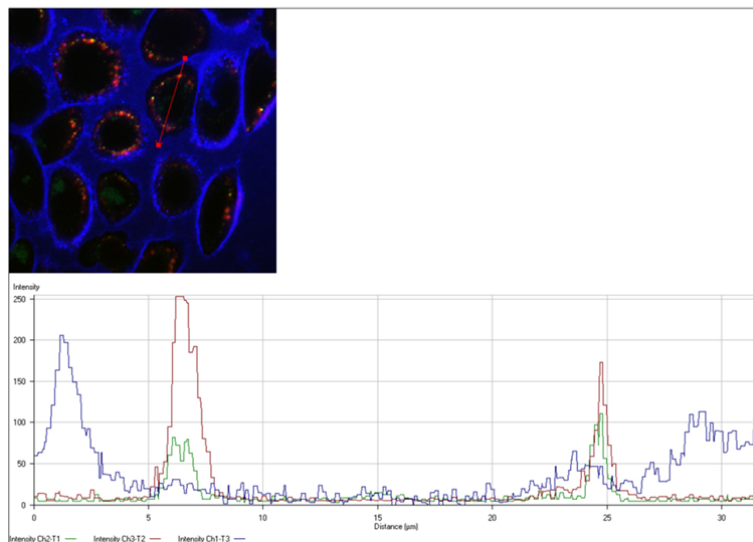

**Figure S2. Intensity Scans to Record Intracellular Localization of Liposomes in *TGM1*<sup>-/-</sup> Keratinocytes**

**A:** Intensity scan along the red line in the equator plane of a *TGM1*<sup>-/-</sup> undifferentiated cell and **B:** of a *TGM1*<sup>-/-</sup> differentiated cell. Traces of the fluorescence intensity of the lipopeptide (green), Rhod-labeled lipid (red) and cell-excluded, membrane-bound trypan blue (blue).

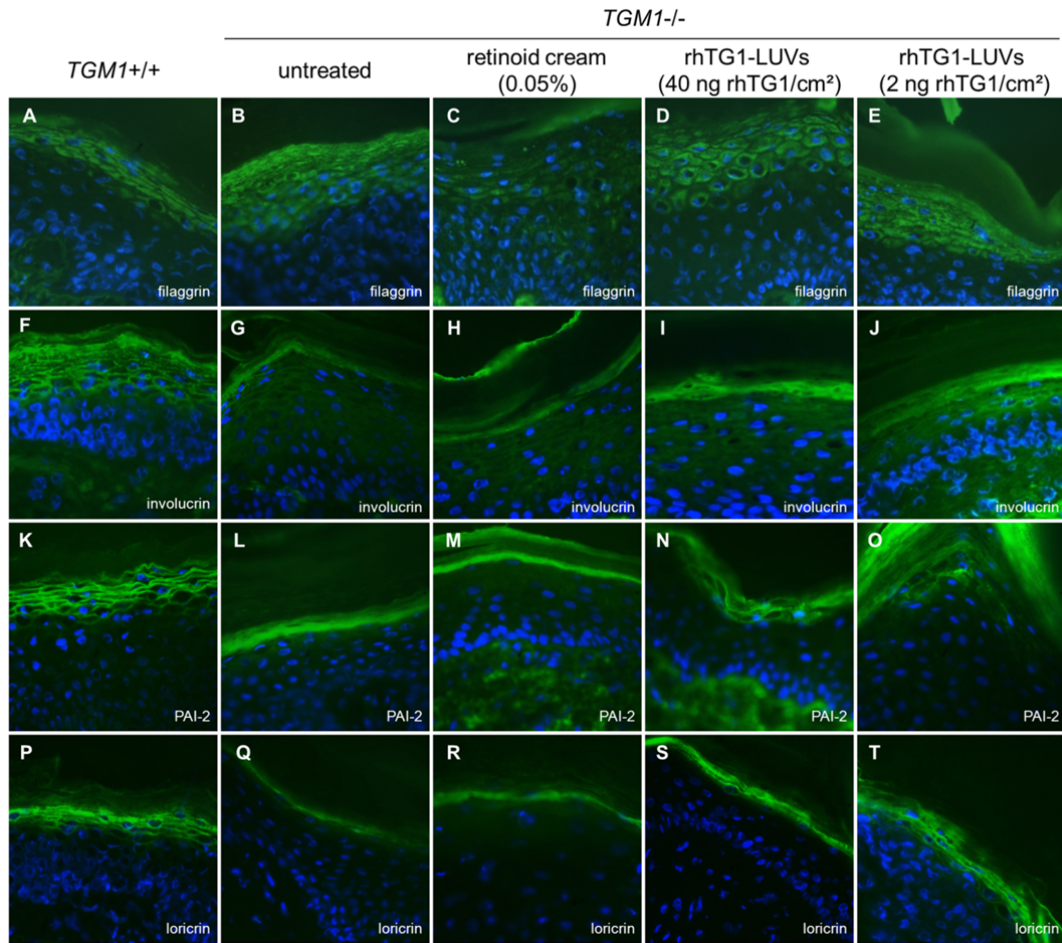

**Figure S3. Immunohistochemical Detection of Differentiation Markers and TG1-Substrates after Treatment with rhTG1-LUV Preparations**

In regenerated TG1-deficient grafts as well as in human TG1-deficient skin the investigated differentiation markers show a more diffuse and shifted distribution when compared to normal skin. Staining of filaggrin (A-E), involucrin (F-J), plasminogen activator inhibitor-2 (PAI-2) (K-O) and loricrin (P-T) in mice treated with rhTG1-LUV formulations reveal a normalization of the distribution patterns when compared to untreated or retinoid treated mice.

**Table S1. Characterisation of Liposomal Preparations of Different Diameters**

|                                                               | <b>MLVs*</b> | <b>LUVs<sup>#</sup></b> | <b>LUVs<sup>#</sup></b> | <b>SUVs<sup>†</sup></b> |
|---------------------------------------------------------------|--------------|-------------------------|-------------------------|-------------------------|
| Diameter [nm]<br>(Dynamic light scattering)                   | > 1500 nm    | 200 nm                  | 100 nm                  | < 50 nm                 |
| Inner volume (calculated)<br>(V=1 ml, 10 mM lipid)            | > 200 µl     | ~ 180 µl                | ~ 55 µl                 | ~ 10 µl                 |
| Amount of encapsulated protein<br>(Dialysis, HPLC)            | +++          | ++                      | ++                      | +                       |
| Stability<br>(Dynamic light scattering)                       | +            | +++                     | +++                     | ++                      |
| Coupling of lipopeptide vector<br>(Fluorescence-spectroscopy) | +++          | +++                     | +++                     | +++                     |
| Polydispersity-Index/Uniformity<br>(Dynamic light scattering) | > 1.0        | 0.108                   | 0.075                   | 0.548                   |

\*MLVs: multilamellar large vesicles; <sup>#</sup>LUVs: large unilamellar vesicles; <sup>†</sup>SUVs: small unilamellar vesicles;  
+++ high; ++ moderate; + low.
